# Supplementary material
Source: HighWire-hosted journal article supplement (http://www.ajnr.org/highwire/filestream/87756/field_highwire_adjunct_files/0/0395.pdf)

## Supplementary tables and figures

**Supplementary Table 1.** Scores by the two independent observers for arterial, venous, and fat suppression of the 3D CRANI sequence. Suppression was scored using a 3-point Likert scale (0: unsuppressed and nondiagnostic; 1: moderately suppressed but diagnostic; 2: excellent suppression). A nerve scoring system using a 5-point Likert scale was adopted from Fuji et al. (4: excellent; 3: good; 2: fair; 1: poor; 0: none).

|             |        |     | Observer 1           |                    |                 |                             |                         |               |              |                         | Observer 2           |                    |                 |                             |                         |               |              |                         |
|-------------|--------|-----|----------------------|--------------------|-----------------|-----------------------------|-------------------------|---------------|--------------|-------------------------|----------------------|--------------------|-----------------|-----------------------------|-------------------------|---------------|--------------|-------------------------|
| Case number | Sex    | Age | Arterial suppression | Venous suppression | Fat suppression | Overall nerve visualization | Inferior alveolar nerve | Lingual nerve | Facial nerve | Greater occipital nerve | Arterial suppression | Venous suppression | Fat suppression | Overall nerve visualization | Inferior alveolar nerve | Lingual nerve | Facial nerve | Greater occipital nerve |
| 1           | Female | 25  | 2                    | 1                  | 2               | 1                           | 3                       | 3             | 3            | 4                       | 2                    | 1                  | 2               | 1                           | 3                       | 3             | 3            | 4                       |
| 2           | Male   | 28  | 2                    | 2                  | 1               | 2                           | 4                       | 4             | 1            | 4                       | 2                    | 2                  | 2               | 2                           | 4                       | 4             | 1            | 4                       |
| 3           | Male   | 25  | 2                    | 1                  | 2               | 1                           | 3                       | 3             | 3            | 3                       | 2                    | 1                  | 2               | 1                           | 3                       | 3             | 2            | 3                       |
| 4           | Male   | 23  | 2                    | 2                  | 2               | 2                           | 4                       | 4             | 4            | 4                       | 2                    | 2                  | 2               | 2                           | 4                       | 4             | 4            | 4                       |
| 5           | Female | 48  | 2                    | 2                  | 1               | 2                           | 4                       | 4             | 4            | 4                       | 2                    | 2                  | 2               | 2                           | 4                       | 4             | 4            | 4                       |
| 6           | Female | 44  | 2                    | 2                  | 2               | 2                           | 4                       | 4             | 4            | 4                       | 2                    | 2                  | 2               | 2                           | 4                       | 4             | 4            | 4                       |

**Supplementary Figure 1.** Pseudo-steady state (PSS) sweep curves indicating the minimum, middle, and maximum angles. After reaching the minimum angle, non-linear interpolation is used to calculate an optimum sweep, while trying to keep the signal constant.

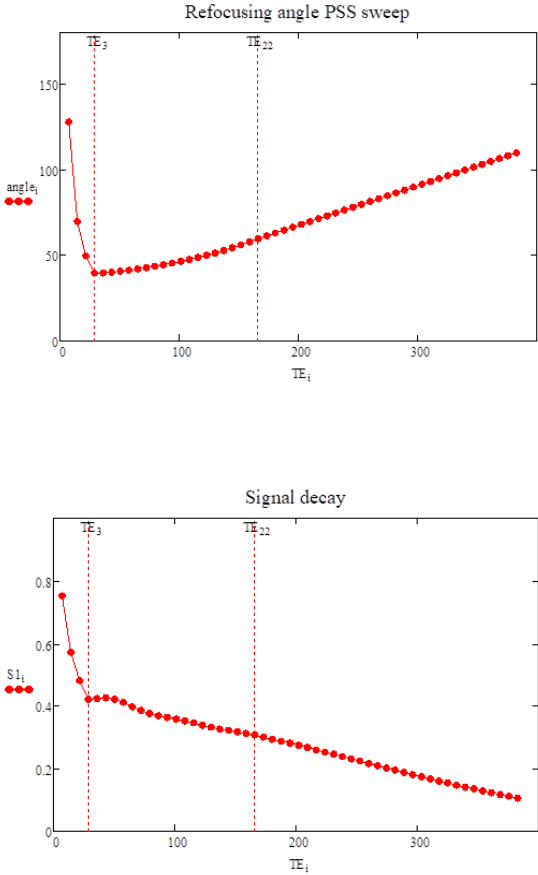

**Supplementary Figure 2.** Comparison of some contemporary magnetic resonance sequences and the newly introduced 3D CRANI sequence in a subject with titanium osteosynthesis material in the left mandible. Notice the artifact reduction when the 3D CRANI sequence is applied. The inferior alveolar nerve is indicated (white arrow). A: 3D CRANI sequence. B: 3D PSIF (reverse fast imaging with steady-state free precession). C: 3D Brainview (Philips, Best, The Netherlands). D: 3D THRIVE (T1 high-resolution isotropic volume excitation).

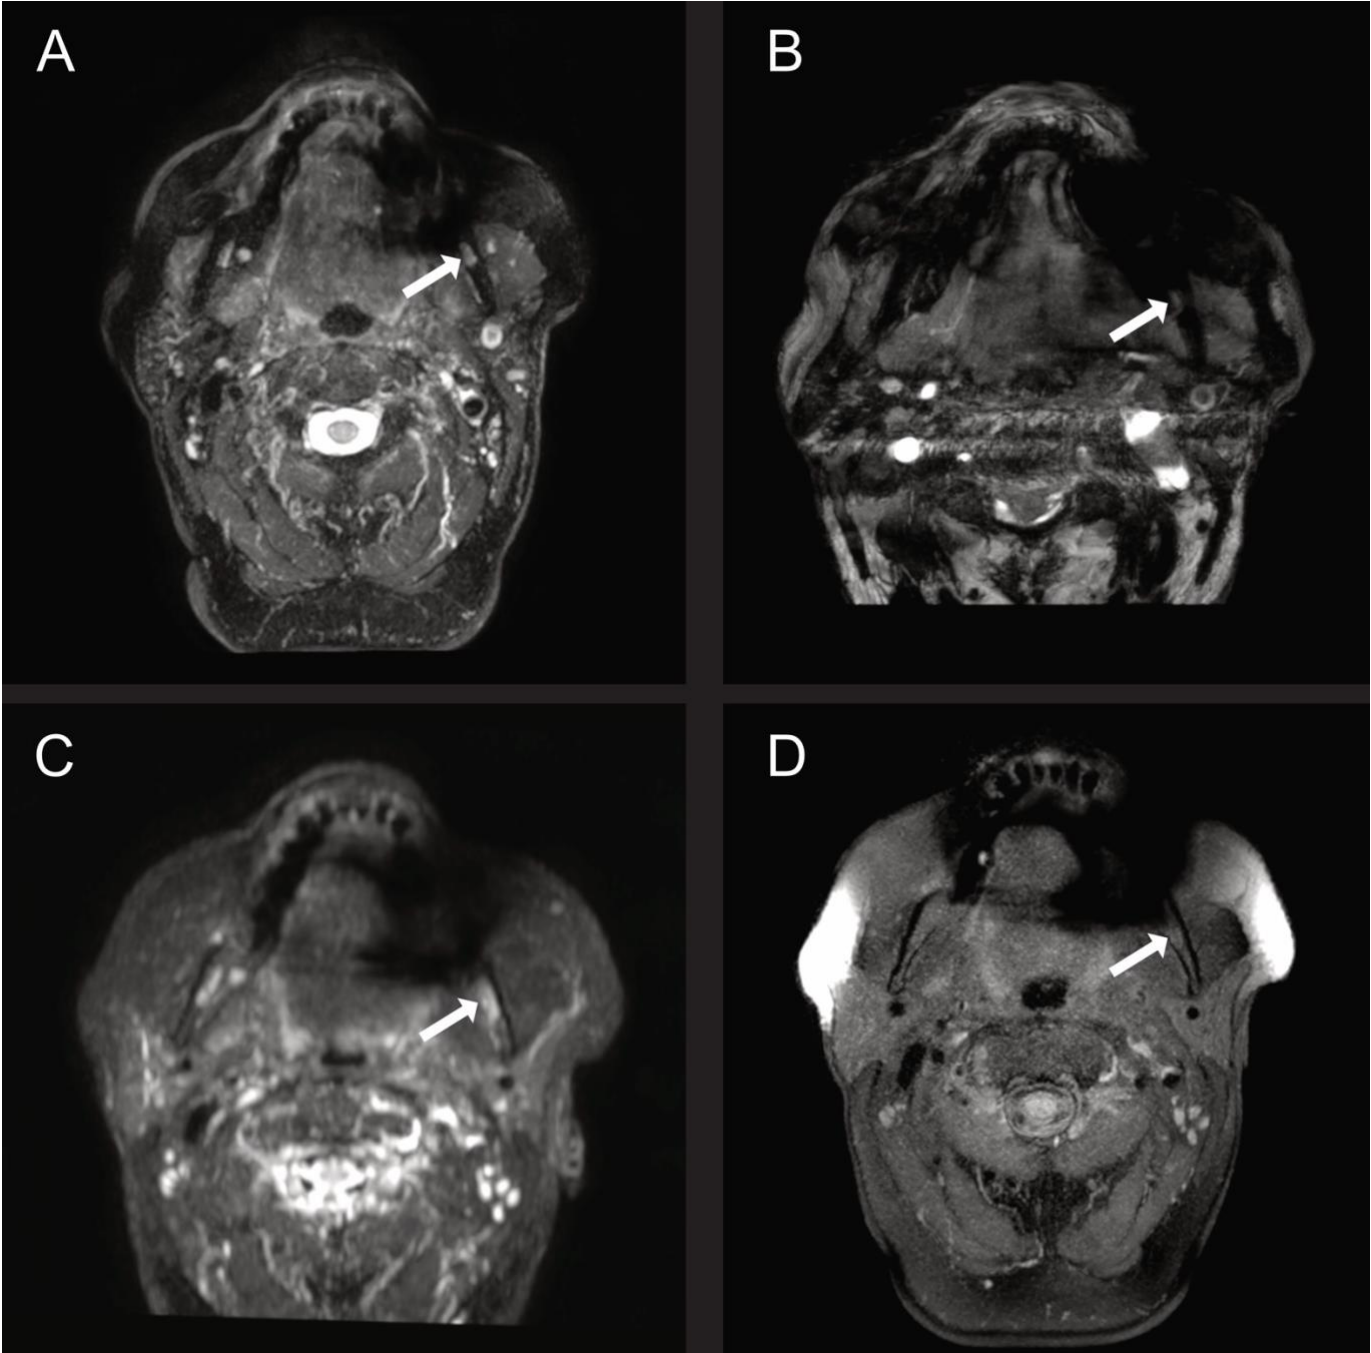

Supplement: 0395.pdf [file 0395.pdf]
